# Supplementary material
Source: PubMed Central journal article supplement (PMC6724528)
Supplement: NIHMS1035417-supplement-Supplemental.pdf [file NIHMS1035417-supplement-Supplemental.pdf]

1 Supplemental figures

2

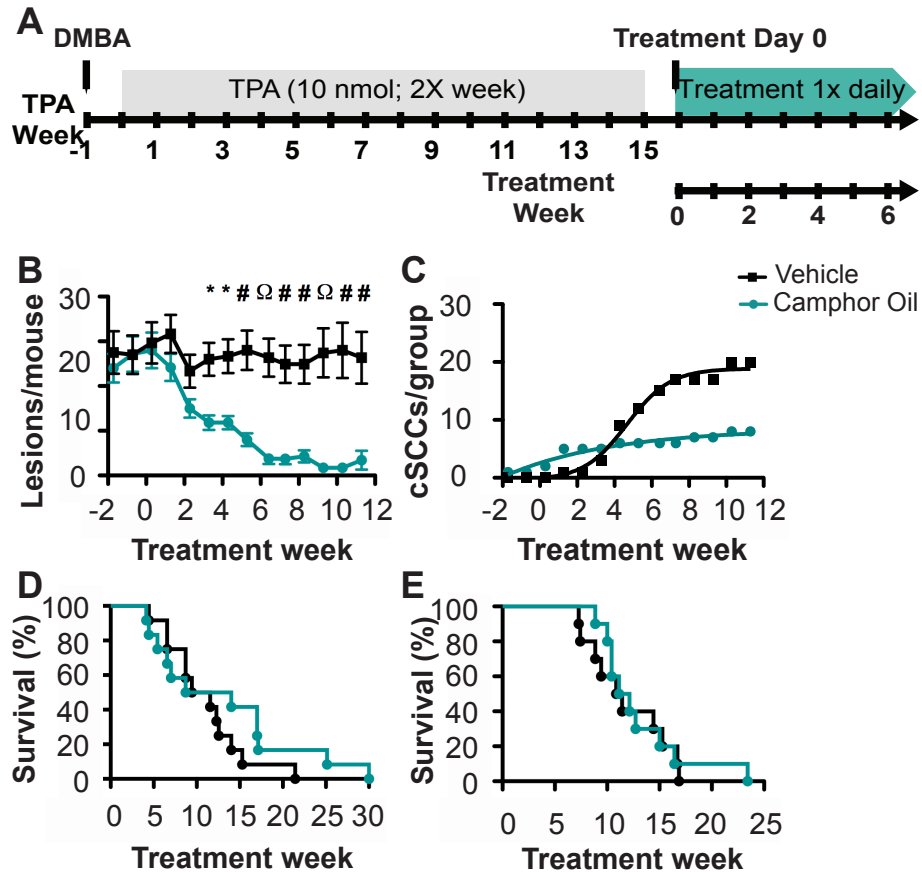

3

4 **Sup. Fig. 1. CWO reduces tumor burden in an independent cohort.**

5 **A.** Mice were treated once with DMBA to induce mutations followed by twice weekly TPA (10 nM)  
 6 for 15 weeks. Animals were then split into matched cohorts and treated daily with topical CWO  
 7 (20%) in vehicle (acetone) or vehicle only.

8 **B.** Topical CWO treatment significantly reduces the total lesion burden (CWO=teal,  
 9 vehicle=black). Two-way ANOVA [ $N=12$  mice per group,  $P<0.0001$   $F(1,252)=106.11$ ]. \* $P<0.05$ ,  
 10 # $P<0.01$ ,  $^{\Omega}P<0.001$  Bonferroni post hoc.

11 **C.** Fewer malignant SCCs formed with CWO treatment than with vehicle treatment. Boltzmann  
 12 fits, difference between fits  $F(4,20)=122.4$   $P<0.0001$ ; CWO:  $R^2=0.93$ , Max cSCC=8.5 weeks;  
 13 Vehicle:  $R^2=0.99$ , Max cSCC=18.89.

14 **D.** Kaplan-Meier Survival analysis of CWO and vehicle treated groups reveals no significant  
 15 difference in survival curves (median CWO=11.36, vehicle=10.5, Log-rank  $P=0.29$ ), but longer  
 16 overall survival time for a subset of treated mice.

17 **E.** Similar survival results were found in the first cohort (Fig 1). Median CWO= 11.64,  
 18 vehicle=11.15, Log-rank  $P=0.74$ ).

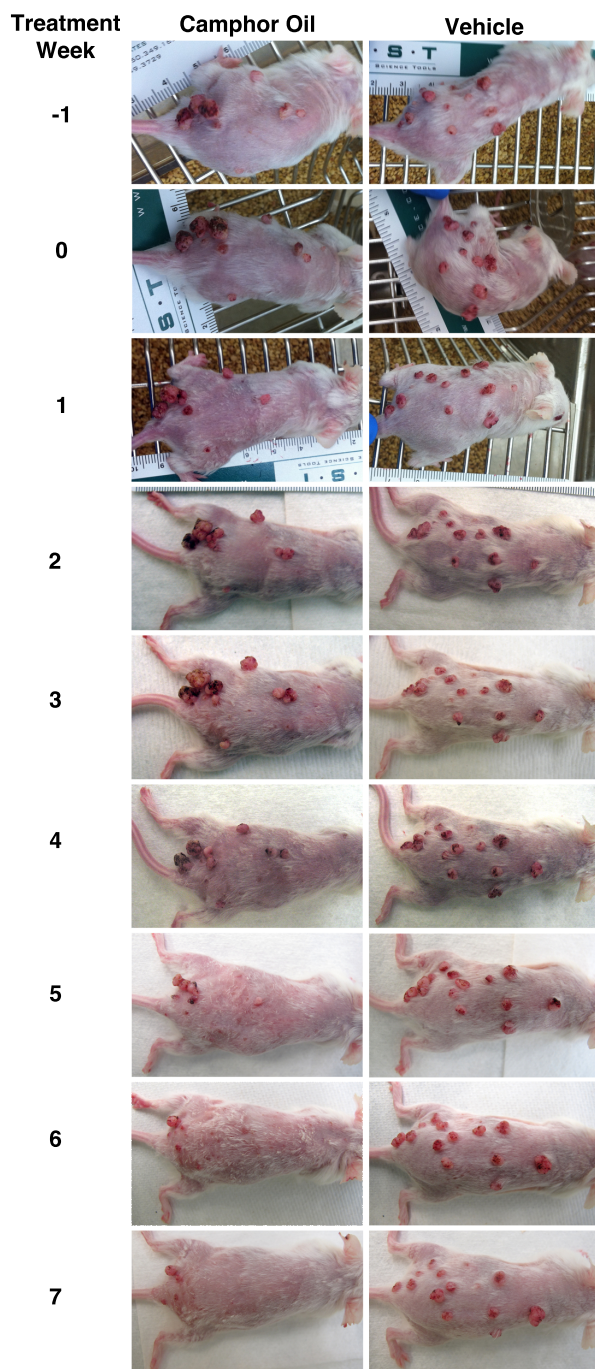

19

20 **Sup. Fig. 2. CWO promotes reduction in existing skin lesions through progressive tumor**  
 21 **loss.**

22 Examples images of single CWO (left) and vehicle (right) treated animals are shown over seven  
 23 weeks of treatment in a second independent cohort. With CWO treatment, tumors progressively  
 24 regressed (Week 0 = 10 tumors, Week 7 = 0 tumors); whereas in control mice, tumors were stable  
 25 in number and grew in size and grade (Week 0 = 13 tumors, Week 7 = 13 tumors).



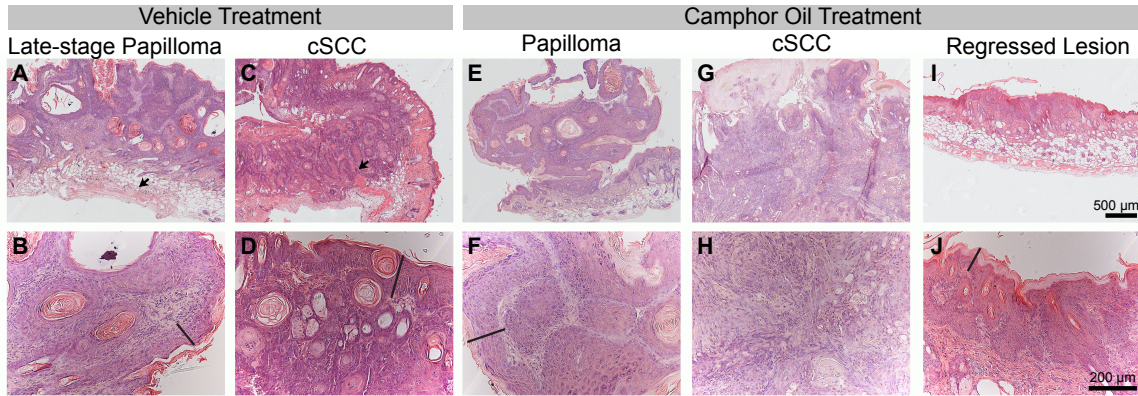

26

27

28 **Sup. Fig. 3. CWO and vehicle tumors appear similar by histology.**

29 **A, B.** A late-stage papilloma from a vehicle treated mouse is shown. Note the largely intact  
 30 layering of the epidermal-dermal boundary (B, black line), panniculus carnosus (arrow) and  
 31 dermal fat.

32 **C, D.** A fully-converted cSCC from a vehicle-treated animal. Notice the loss of epidermal layering  
 33 (D, line), and the loss of integrity of the panniculus carnosus (C, arrow).

34 **E, F.** A papilloma from a CWO treated mouse is shown with intact layering of the epidermis (F). **G,**

35 **H.** A cSCC from a CWO treated mouse is shown. Note the lack of organization in H.

36 **I, J.** Histology from a regressed lesion in a CWO treated mouse is shown. Here, the epidermal  
 37 layer is thick (line), a sign of hyperproliferation, but normal skin layering seems to be intact.

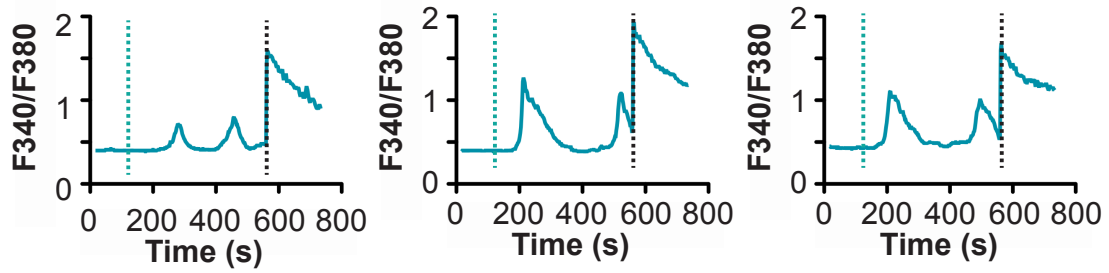

38

39 **Sup. Fig. 4. CWO induces waves of calcium signaling in human keratinocytes.**

40 Representative example traces show recurrent calcium waves after 0.04% CWO treatment. Teal

41 dashed line indicates CWO application. Black dashed line indicates histamine control.

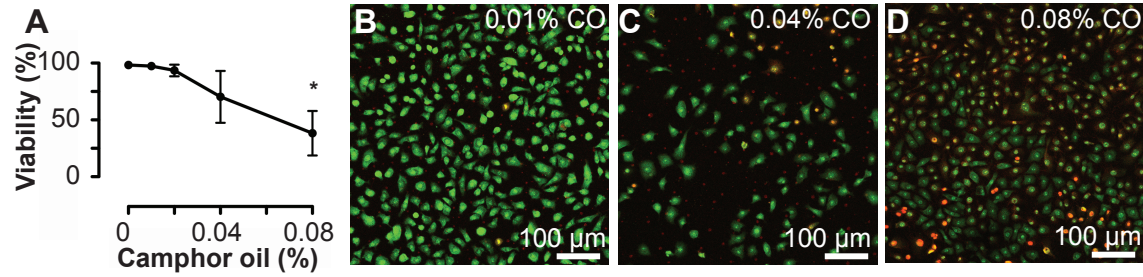

42

43 **Sup. Fig. 5. Cultured keratinocytes are viable with CWO treatment.**

44 **A.** Percent of normal human epidermal keratinocytes that are viable following 30-minute  
 45 incubation with 0-0.08% CWO in keratinocyte media (N=3 experiments with >3800 cells per  
 46 replicate; One-way ANOVA  $p < 0.05$ , Dunnett's Multiple Comparison Test against 0% \* $P < 0.05$ ).

47 **B-C.** Representative images from viability assay showing calcein-AM (green) and ethidium  
 48 homodimer-1 (red) of normal human epidermal keratinocytes treated with 0.01% CWO (**B**) 0.04%  
 49 CWO (**C**) and 0.08% CWO. All cells are labeled by calcein, but only dead cells by ethidium  
 50 homodimer-1.  
 51

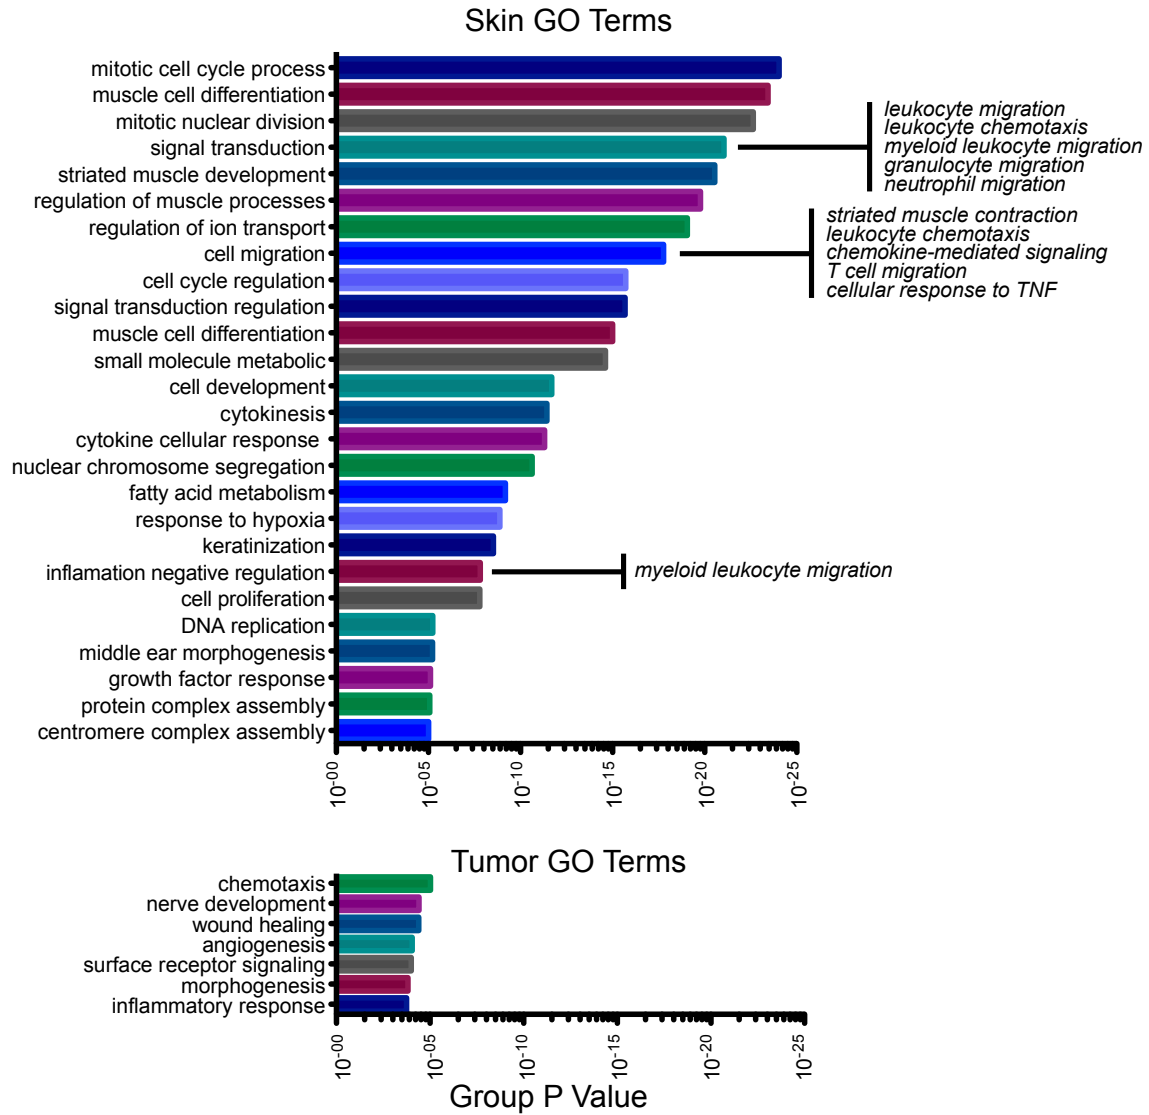

53

54 **Sup. Fig. 6. Extended RNA-Seq analysis of tumors and skin treated with CWO.**

55 GO analysis of genes differentially expressed in epidermis and tumors treated with CWO  
 56 compared to vehicle. GO term fusion was used, and selected GO terms within a fused node  
 57 related to inflammation are shown.

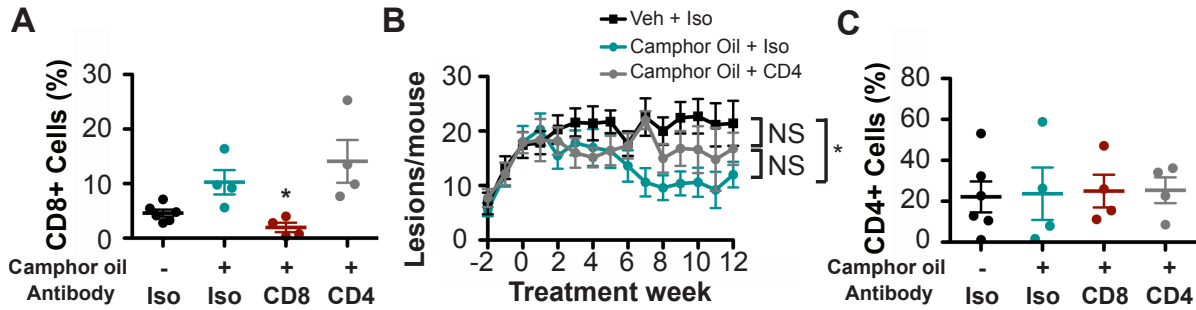

58

59

60 **Sup. Fig. 7. Antibody depletion.**

61 Blood from animals in T cell blocking experiments were analyzed for antibody efficiency at  
 62 sacrifice. Mice were sacrificed between 12-13 weeks after the start of treatment, and 5-6 days  
 63 after the final antibody injection.

64 **A.** A significant effect of treatment was found on circulating CD8+ T cells ( $P < 0.01$ ) Circulating  
 65 CD8+ cells were significantly reduced with CD8 antibody treatments. Interestingly, circulating  
 66 CD8+ cells were increased with CWO treatment.

67 **B.** Co-treatment with CD4 blocking antibodies and topical CWO resulted in an intermediate effect  
 68 on tumor reduction. CD4/CWO treatment was not significantly (NS) different from either  
 69 Isotype/CWO or Isotype/veh groups by two-way ANOVA. CWO treatment had similar effects on  
 70 tumor burden to previous cohorts,  $*P < 0.05$

71 **C.** No effect of treatment was found on circulating CD4+ T cells, indicating that CD4+ T cells were  
 72 not sufficiently blocked between injections.

73 N=4-6 mice per group.



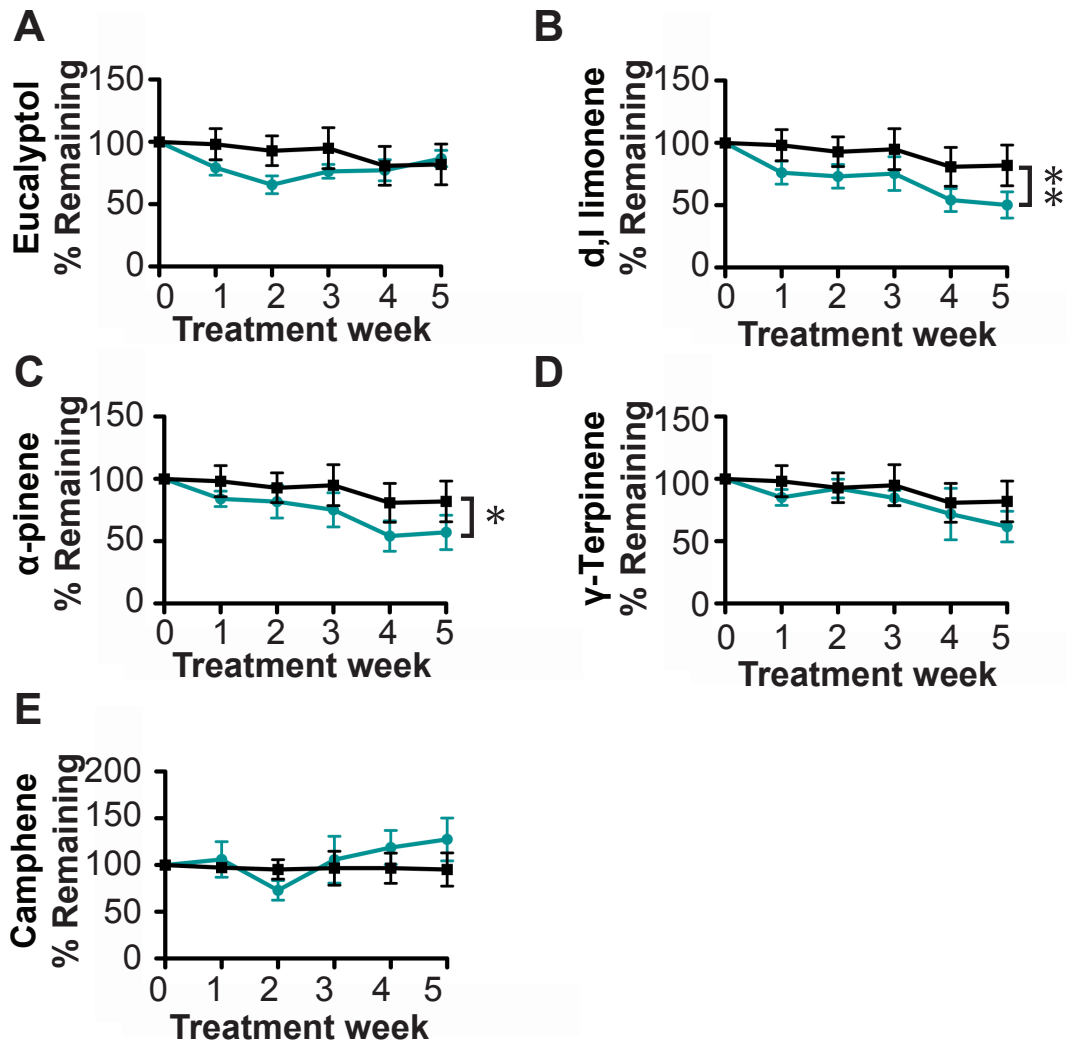

74

75 **Sup. Fig. 8. CWO constituents reduce tumor burden.**

76 Pilot studies were performed to identify CWO constituents that reduce tumor burden. Tumors  
 77 were induced as before and mice were split into groups with equal total tumor burdens. Mice were  
 78 treated with 20% Eucalyptol (**A**), d,l-Limonene (**B**),  $\alpha$ -pinene (**C**),  $\gamma$ -terpinene (**D**), and camphene  
 79 (**E**). Data are baseline corrected to tumor counts at time zero for each mouse. Two-way ANOVAs  
 80 reveal significant treatment effects of d,l-limonene ( $P < 0.01$ ) and  $\alpha$ -pinene ( $P < 0.05$ ).

81
